# Supplementary material for: The glaciers of the Dolomites: the last 40 years of melting
Source: Copernicus journal article supplement (doi:10.5194/tc-19-1335-2025), 2025-03-24
Supplement: Supplementary file 1 [file tc-19-1335-2025-supplement.pdf]

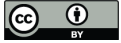

*Supplement of*

## **The glaciers of the Dolomites: the last 40 years of melting**

**Andrea Securo et al.**

*Correspondence to:* Andrea Securo (andrea.seкуро@unive.it)

The copyright of individual parts of the supplement might differ from the article licence.

| (Sector ID) Name                    | RGI-ID <sup>(a)</sup> | CGI-ID | Elevation <sup>(a)</sup> | Aspect | Area <sup>(b)</sup> |
|-------------------------------------|-----------------------|--------|--------------------------|--------|---------------------|
| <i>(1) Popera Alto</i>              | -11.03918             | 978    | 2486                     | E      | 0.09                |
| <i>(1) Popera Pensile</i>           | -11.03919             | 977    | 2722                     | N-E    | 0.07                |
| <i>(2) Cristallo</i>                | -11.03903             | 937    | 2483                     | N      | 0.24                |
| <i>(3) Sorapiss Occidentale</i>     | -11.03902             | 975    | 2661                     | N      | 0.19                |
| <i>(4) Antelao Superiore</i>        | -11.03910             | 966    | 2617                     | N-E    | 0.27                |
| <i>(4) Antelao Inferiore</i>        | -11.03909             | 967    | 2441                     | N      | 0.19                |
| <i>(5) Marmolada <sup>(c)</sup></i> | -                     | -      | 2918                     | N      | 1.49                |
| <i>M. Principale</i>                | -11.03887             | 941    | -                        | N      | -                   |
| <i>M. Punta Penia</i>               | -11.03883             | 942    | -                        | N      | -                   |
| <i>M. Ovest</i>                     | -11.03880             | -      | -                        | N      | -                   |
| <i>M. Centrale</i>                  | -11.03884             | -      | -                        | N      | -                   |
| <i>(6) Fradusta <sup>(d)</sup></i>  | -                     | 950    | 2703                     | N      | 0.03                |
| <i>F. Superiore-Inferiore</i>       | -11.03889             | -      | -                        | N      | -                   |
| <i>F. Superiore</i>                 | -11.03888             | -      | -                        | N      | -                   |
| <i>(6) Travignolo</i>               | -11.03871             | 947    | 2529                     | N      | 0.04                |

5 **Table S1. Remaining mountain glaciers in the Dolomites region analysed in this study.** <sup>(a)</sup> RGI ID (RGI60-) and median elevation are retrieved from Randolph Glacier Inventory v 7.0 data (RGI Consortium, 2023). <sup>(b)</sup> Glacier area from Smiraglia and Diolaiuti (2015) inventory. <sup>(c)</sup> Marmolada Glacier includes data averaged from all its sectors, as they are now divided but considered as one here, as they were in the 1980s. <sup>(d)</sup> Fradusta Glacier was formerly a single glacier that split into two (F. Superiore and F. Inferiore), with the latter not existing anymore.

| Year - Archive Images | Date <sup>(a)</sup> | Campaign name          | Size                   | Format | Coverage <sup>(b)</sup> |
|-----------------------|---------------------|------------------------|------------------------|--------|-------------------------|
| 1980                  | 23-25 Jul           | <i>Reven Belluno</i>   | 23 x 23 cm             | A (BW) | 3                       |
| 1982                  | -                   | <i>Reven M. Veneta</i> | 23 x 23 cm             | A (BW) | 4, 5, 6                 |
| 1991                  | 19 Sep              | <i>Reven M. Veneta</i> | 23 x 23 cm             | A      | 4                       |
| 1992                  | 8-21 Aug            | <i>Reven M. Veneta</i> | 23 x 23 cm             | A      | 1, 2, 3, 5, 6           |
| 1999                  | 8-28 Oct            | <i>Reven Cadore</i>    | 23 x 23 cm             | A (BW) | 4                       |
| 2001                  | 14-15 Oct           | <i>Reven Belluno</i>   | 23 x 23 cm             | A (BW) | -                       |
| 2010                  | 21-22 Sep           | <i>Reven Cadore</i>    | 10368 x 5760 px        | D      | 4                       |
| 2012                  | 21 Aug              | <i>Reven Agordo</i>    | 12983 x 8483 px        | D      | 5                       |
| Year - Other Surveys  | Date                | Survey Type            | Sensor                 |        | Coverage                |
| 2010                  | 1 Aug – 10 Oct      | Airborne LiDAR         | Optech ALTM 3100 EA    |        | All                     |
| 2014                  | 23-26 Sep           | Airborne LiDAR         | Optech ALTM 3100 EA    |        | All                     |
| 2023                  | 9 Sep – 1 Oct       | UAV                    | DJI Mavic 2, DJI Air 2 |        | 1, 2, 3, 4, 6           |
| 2023                  | 10 Oct              | Aerial photos          | Canon 6D MkII          |        | 5                       |

10 **Table S2. Information regarding the dataset used in this study.** All the aerial photos are available online under the licence *Italian Open Data License 2.0 (IODL 2.0)* and are the property of *Regione del Veneto – L.R. n. 28/76 Formazione della Carta Tecnica Regionale*. 2010 and 2012 photos have been used only for visual reference and not for mass balance reconstructions. Format of archive imagery is Digital (D) or Analogue Scan (A), with some scans in black and white (BW). <sup>(a)</sup> Date related only to the portion of

the flight used in this work. <sup>(b)</sup> Area IDs as for Fig. 1 represent only the successfully reconstructed scenes. The complete coverage of the aerial imagery is shown in Fig. S2.

15

| Area ID               | Year | Date     | Photos | Resolution (m/pix) | Tie Points | Dense Cloud points | GCP number |
|-----------------------|------|----------|--------|--------------------|------------|--------------------|------------|
| 1 (Popera)            | 1992 | 21 Aug.  | 10     | 0.88               | 61,444     | 10,329,170         | 6          |
| 1 (Popera Alto)       | 2023 | 12 Sept. | 144    | 0.05               | 99,047     | 63,057,487         | 12         |
| 1 (Popera Pensile)    | 2023 | 12 Sept. | 66     | 0.14               | 13,634     | 11,108,717         | 12         |
| 2 (Cristallo)         | 1992 | 21 Aug.  | 6      | 0.87               | 28,503     | 17,319,719         | 6          |
| 2 (Cristallo)         | 2023 | 24 Sept. | 218    | 0.13               | 94,549     | 50,806,741         | 12         |
| 3 (Sorapiss)          | 1980 | 23 Jul.  | 11     | 0.91               | 45,642     | 2,482,055          | 6          |
| 3 (Sorapiss)          | 1992 | 20 Aug.  | 12     | 1.01               | 133,237    | 12,785,764         | 15         |
| 3 (Sorapiss)          | 2023 | 9 Sept.  | 177    | 0.11               | 47,987     | 30,558,608         | 12         |
| 4 (Antelao)           | 1980 | 25 Jul.  | 7      | 1.57               | 109,269    | 10,832,894         | 8          |
| 4 (Antelao)           | 1992 | 19 Aug.  | 7      | 0.65               | 51,292     | 17,122,069         | 13         |
| 4 (Antelao)           | 1999 | 14 Oct.  | 4      | 0.83               | 45,538     | 14,662,362         | 17         |
| 4 (Antelao)           | 2010 | 21 Sept. | 7      | 0.41               | 233,167    | 44,645,484         | 22         |
| 4 (Antelao Superiore) | 2023 | 10 Sept. | 553    | 0.06               | 729,420    | 192,905,021        | 12         |
| 4 (Antelao Inferiore) | 2023 | 10 Sept. | 138    | 0.15               | 23,018     | 23,174,756         | 12         |
| 5 (Marmolada)         | 1982 | -        | 17     | 1.50               | 196,459    | 5,005,926          | 10         |
| 5 (Marmolada)         | 1992 | 19 Aug.  | 12     | 0.85               | 64,420     | 16,352,851         | 6          |
| 5 (Marmolada)         | 2001 | 15 Oct.  | 13     | 0.65               | 121,102    | 18,865,131         | 9          |
| 5 (Marmolada)         | 2012 | 20 Aug.  | 17     | 0.22               | 292,028    | 126,682,805        | 14         |
| 5 (Marmolada)         | 2023 | 10 Oct.  | 250    | 0.35               | 23,053     | 61,140,047         | 12         |
| 6 (Pale di S.M.)      | 1982 | -        | 32     | 1.59               | 448,348    | 35,196,925         | 13         |
| 6 (Pale di S.M.)      | 1992 | 9 Aug.   | 28     | 0.71               | 494,427    | 45,856,617         | 18         |
| 6 (Fradusta)          | 2001 | 15 Oct.  | 16     | 0.74               | 210,548    | 25,732,223         | 16         |
| 6 (Travignolo)        | 2023 | 30 Sept. | 130    | 0.09               | 43,916     | 31,107,078         | 12         |
| 6 (Fradusta)          | 2023 | 30 Sept. | 71     | 0.06               | 30,193     | 25,419,814         | 12         |

**Table S3. SfM-MVS export report and dates divided by areas (see Fig. 1 for reference): Popera (1), Cristallo (2), Sorapiss (3), Antelao (4), Marmolada (5), Pale di San Martino (6); years of aerial acquisition and number of photos processed per year; Ground Resolution; Tie Points of the first alignment phase; GCP number used in the SfM pipeline, sometimes some of them have lately been excluded as not recognizable with precision in the aerial photos; RMSE error in m for Z only and XYZ (total) as computed by Metashape for the entire area, including poorly covered borders where photo coverage is less high (see Fig. S2).**

20

25

| Glacier                         | Area (km <sup>2</sup> ) |         |           |      |      |
|---------------------------------|-------------------------|---------|-----------|------|------|
|                                 | 1980-82                 | 1991-92 | 1999-2001 | 2010 | 2023 |
| <i>Popera Alto</i>              | -                       | 0.11    | -         | 0.10 | 0.10 |
| <i>Popera Pensile</i>           | -                       | 0.05    | -         | 0.05 | 0.03 |
| <i>Cristallo</i>                | -                       | 0.19    | -         | 0.11 | 0.06 |
| <i>Sorapiss Occidentale</i>     | 0.27                    | 0.19    | -         | 0.18 | 0.17 |
| <i>Antelao Superiore</i>        | 0.31                    | 0.28    | 0.25      | 0.24 | 0.19 |
| <i>Antelao Inferiore</i>        | 0.20                    | 0.16    | 0.13      | 0.11 | 0.09 |
| <i>Marmolada</i> <sup>(a)</sup> | 2.52                    | 2.28    | -         | 1.64 | 1.00 |
| <i>Travignolo</i>               | 0.24                    | 0.23    | -         | 0.17 | 0.14 |
| <i>Fradusta</i> <sup>(a)</sup>  | 0.27                    | 0.24    | -         | 0.09 | 0.03 |

30 **Table S4. Areas of the Dolomites glaciers during different intervals (km<sup>2</sup>).** <sup>(a)</sup> Marmolada and Fradusta Glaciers are treated as one even after segmentation.

| Glacier                         | Common Area Surface Elevation Change (m) |                      |                 |              |                       |
|---------------------------------|------------------------------------------|----------------------|-----------------|--------------|-----------------------|
|                                 | 1980s                                    | 1990s                | 2000s           | 2010s        | Average Rate          |
|                                 | 1980-82 to 1991-92                       | 1991-1992 to 1999-01 | 1999-01 to 2010 | 2010 to 2023 | All periods available |
| <i>Popera Alto</i>              | -                                        | -11.2 ± 2.6          |                 | -8.7 ± 0.3   | -19.9                 |
| <i>Popera Pensile</i>           | -                                        | -10.2 ± 2.6          |                 | -6.8 ± 0.3   | -17.0                 |
| <i>Cristallo</i>                | -                                        | -11.3 ± 1.8          |                 | -10.1 ± 0.4  | -21.4                 |
| <i>Sorapiss Occidentale</i> (a) | -3.0                                     | -19.6                |                 | -3.4 ± 0.3   | -26.0                 |
| <i>Antelao Superiore</i> (b)    | -6.6                                     | -4.7                 | -12.7           | -7.5 ± 0.3   | -31.5                 |
| <i>Antelao Inferiore</i> (b)    | -1.4                                     | -5.7                 | -8.6            | -11.7 ± 0.3  | -27.4                 |
| <i>Marmolada</i> (c)            | -8.9                                     | -14.7                |                 | -10.6 ± 0.3  | -34.2                 |
| <i>Travignolo</i>               |                                          | -21.4 ± 4.8          |                 | -10.0 ± 0.4  | -31.4                 |
| <i>Fradusta</i> (d)             | -6.2                                     | -28.5                |                 | -15.0 ± 0.4  | -49.7                 |

35 **Table S5. Average surface elevation change measured on common glacier area (for each comparison) for the 9 Dolomites glaciers.** 1980s reference year is 1982 (1980 for *Sorapiss*); 1990s is 1992 (1991 for *Antelao*), 2010s is 2010 and 2020s is 2023. Maps of the surface elevation change of the first period (1980s-2010) retrieved from historical SfM and the modern data (2010-2023) are presented respectively in Fig. 6 and 7. Surface Elevation Change uncertainty ( $\delta_s$ ) is calculated for cumulative periods comparisons and during 1980s-2010 was (a) ± 1.7 m, (b) ± 3.1 m, (c) ± 2.9 m, (d) ± 1.4 m.

40

45

| Glacier                         | Geodetic Mass Balance Rate (m w.e. yr <sup>-1</sup> ) |                      |                 |              |                       |
|---------------------------------|-------------------------------------------------------|----------------------|-----------------|--------------|-----------------------|
|                                 | 1980s                                                 | 1990s                | 2000s           | 2010s        | Average Rate          |
|                                 | 1980-82 to 1991-92                                    | 1991-1992 to 1999-01 | 1999-01 to 2010 | 2010 to 2023 | All periods available |
| <i>Popera Alto</i>              | -                                                     | -0.31 ± 0.13         |                 | -0.57 ± 0.04 | -0.55                 |
| <i>Popera Pensile</i>           | -                                                     | -0.28 ± 0.13         |                 | -0.44 ± 0.04 | -0.47                 |
| <i>Cristallo</i>                | -                                                     | -0.31 ± 0.09         |                 | -0.66 ± 0.05 | -0.59                 |
| <i>Sorapiss Occidentale (a)</i> | -0.21                                                 | -0.54                |                 | -0.35 ± 0.02 | -0.51                 |
| <i>Antelao Superiore (b)</i>    | -0.62                                                 | -0.57                | -0.98           | -0.77 ± 0.04 | -0.65                 |
| <i>Antelao Inferiore (b)</i>    | -0.13                                                 | -0.69                | -0.66           | -0.49 ± 0.04 | -0.57                 |
| <i>Marmolada (c)</i>            | -0.75                                                 | -0.70                |                 | -0.69 ± 0.05 | -0.71                 |
| <i>Travignolo</i>               | -0.65 ± 0.15                                          |                      |                 | -0.65 ± 0.05 | -0.65                 |
| <i>Fradusta (d)</i>             | -0.52                                                 | -1.34                |                 | -0.73 ± 0.07 | -1.03                 |

50 **Table S6. Mass Balance rates (m w.e. yr<sup>-1</sup>) of the Dolomites glaciers during the last four decades. The mass balance uncertainty  $\delta_{mb}$  is calculated for cumulative periods comparisons and during 1980s-2010 was (a) ± 0.07 m, (b) ± 0.11 m, (c) ± 0.10 m, (d) ± 0.07 m. *Sorapiss Occidentale* values have been corrected removing the positive elevation gain portion for 2010-2023; Marmolada and Fradusta mass balance are based on the average of all (now segmented) parts of the former glacier. All calculations are based on common areas.**

55

| Glacier                     | Total Ice Mass Loss (Mt)<br>Entire Period available in this study | % of the Total<br>Dolomites Loss |
|-----------------------------|-------------------------------------------------------------------|----------------------------------|
| <i>Popera Alto</i>          | 0.95                                                              | 1.6                              |
| <i>Popera Pensile</i>       | 0.43                                                              | 0.6                              |
| <i>Cristallo</i>            | 1.36                                                              | 2.1                              |
| <i>Sorapiss Occidentale</i> | 5.08                                                              | 5.3                              |
| <i>Antelao Superiore</i>    | 6.07                                                              | 7.9                              |
| <i>Antelao Inferiore</i>    | 3.57                                                              | 4.0                              |
| <i>Marmolada</i>            | 54.41                                                             | 65.7                             |
| <i>Travignolo</i>           | 4.37                                                              | 5.5                              |
| <i>Fradusta</i>             | 6.86                                                              | 7.3                              |

**Table S7. Total ice mass loss (Mt) during the observation period available in this study and % of the dataset.**

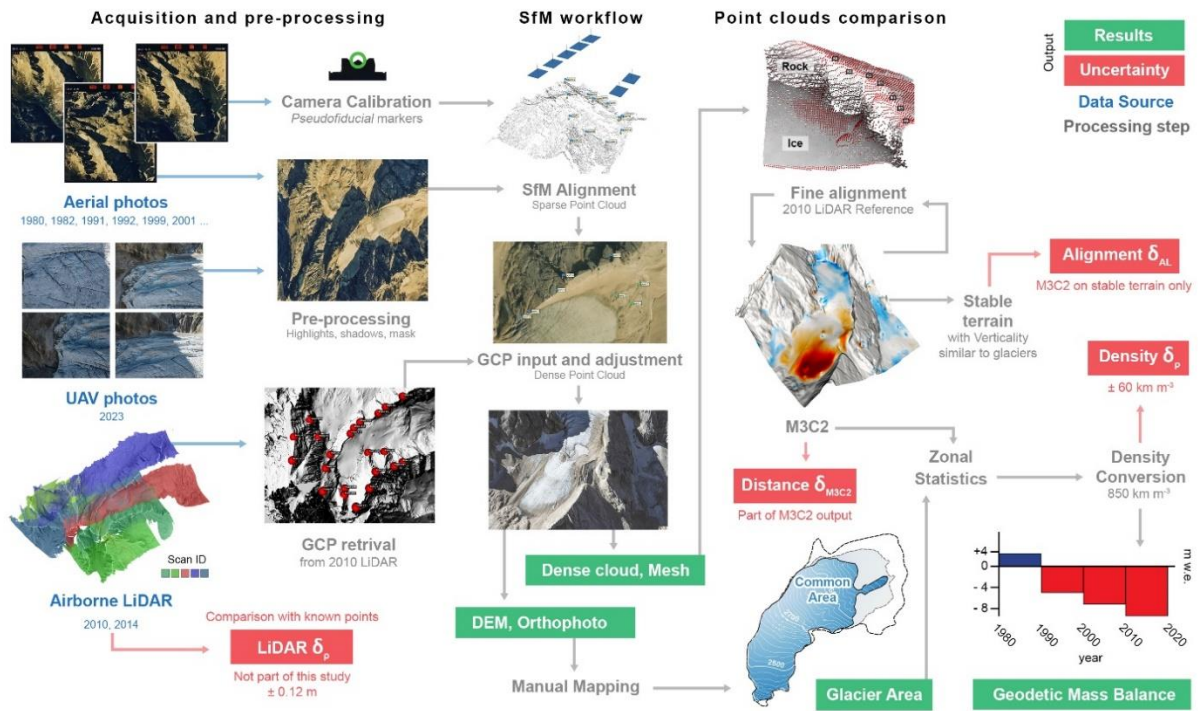

60

Figure S1: Visual representation of the processing workflow described in Manuscript Section 3. Green boxes (results) and red boxes (uncertainties) represent the output of the processing workflow.

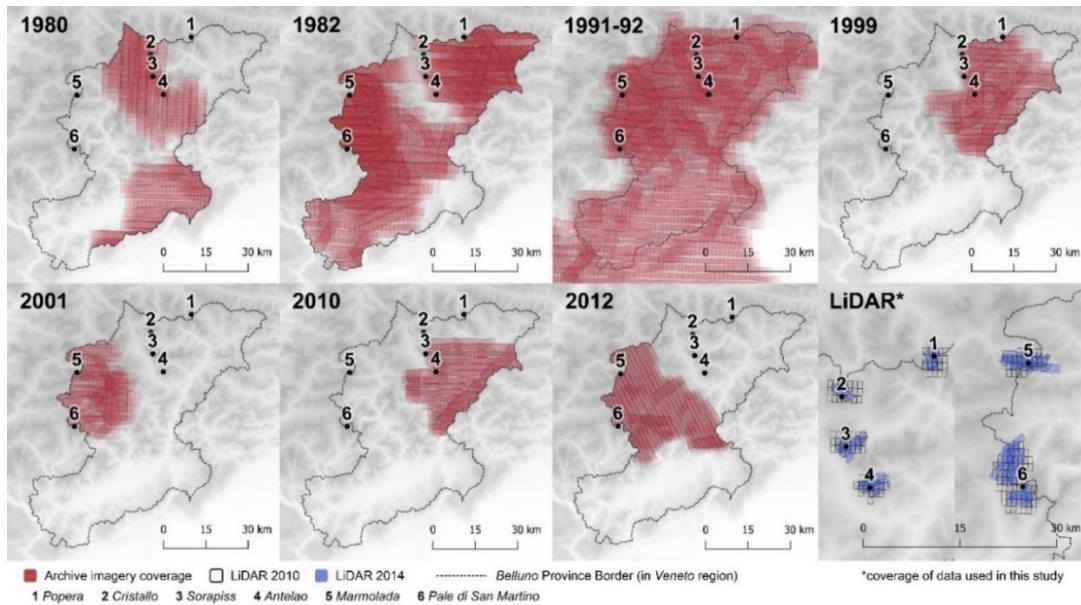

65

Figure S2: Archival imagery (1980, 1982, 1991-92, 1999, 2001, 2010, 2012) and LiDAR (2010, 2014) data coverage in the Veneto Region (Bolzano province, black line). Most of the archival imagery extends with some frames across the administrative border. Reference dates and data description are available in Table 2.

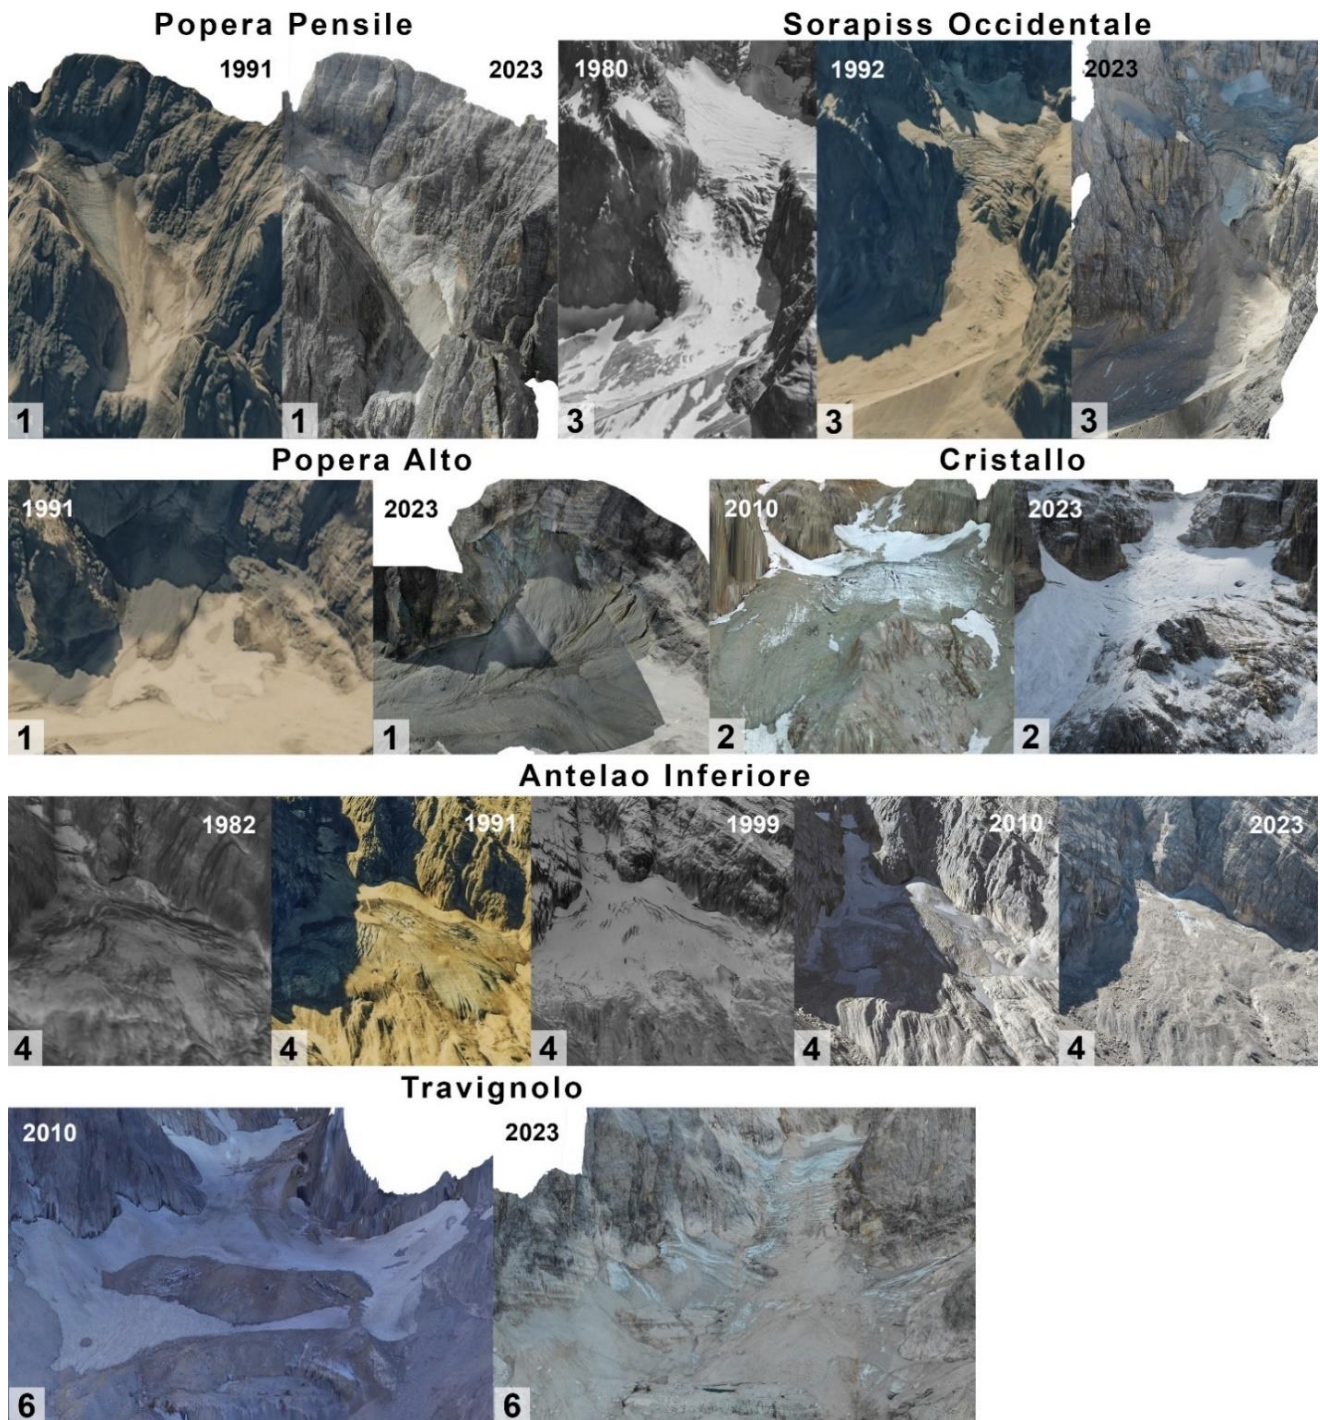

70

Figure S3. Examples of the reconstructed 3D textured models (i.e., triangular meshes derived from dense point clouds) of the Dolomites glaciers during different decades. Missing reconstructions from Marmolada, Fradusta and Antelao are shown in the manuscript (Fig. 3).

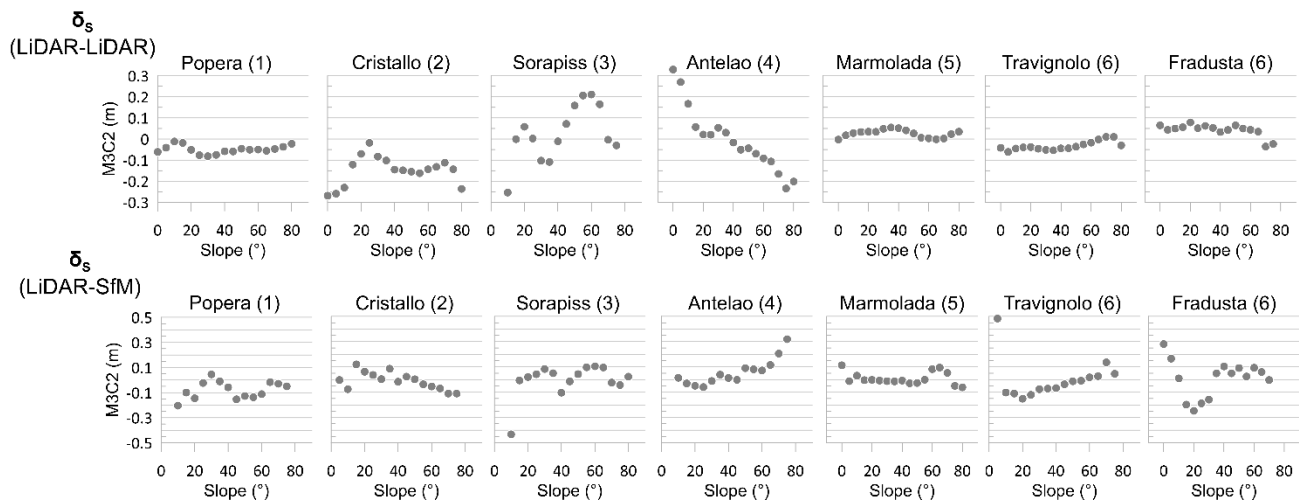

75

Figure S4. Scatter plot of  $\delta_s$  (m), based on M3C2 distance measurements on stable terrain, and slope ( $5^\circ$  bins) for LiDAR-LiDAR comparisons (2010-2014) and LiDAR-SfM comparison in all the surveyed areas.

### 2010-2014 Surface Elevation Change

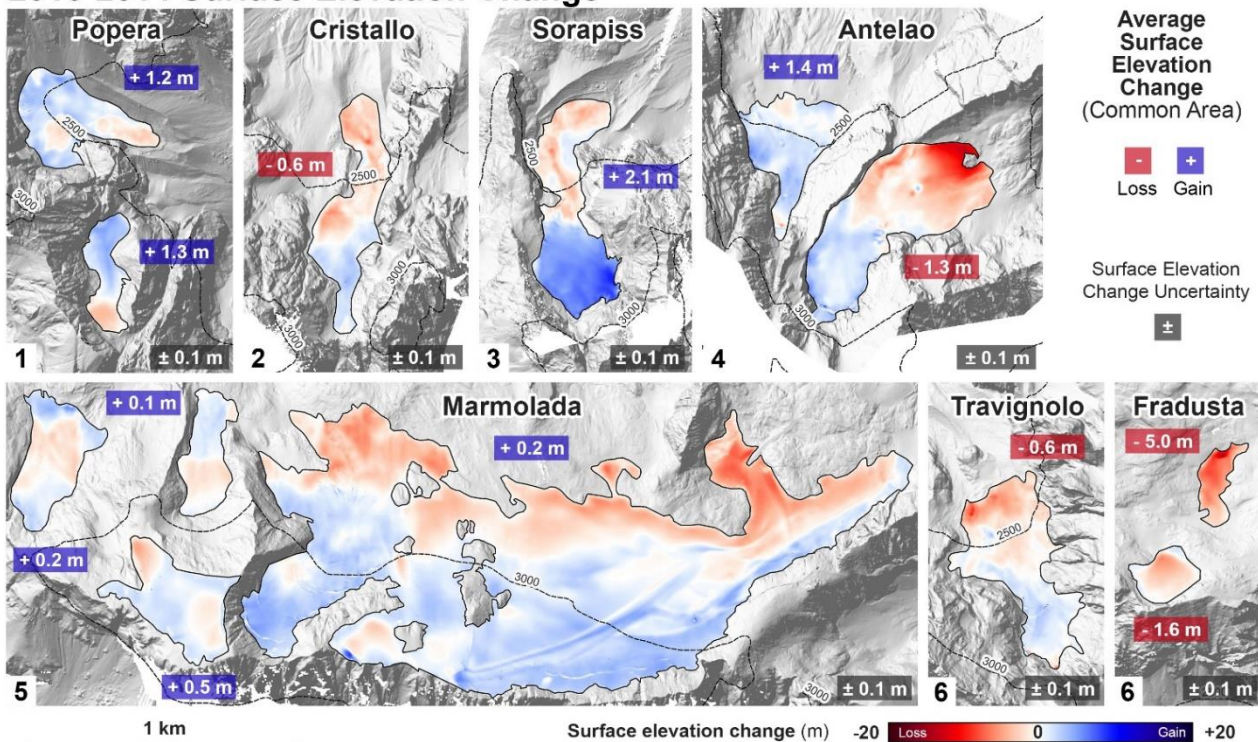

80 Figure S5. Surface elevation change (m) measured across the Dolomites glaciers from 2010 to 2014. Average surface elevation change, and its uncertainty, are reported for every glacier using common area.
